# Supplementary material
Source: MDPI journal article supplement (https://www.mdpi.com/2227-9717/10/4/668)
Supplement: s1 [file s1]

## **Supplementary Information**

### **High-property anode catalyst compositing Co-based perovskite and NiFe-layered double hydroxides for alkaline seawater splitting**

Ruigan Hu <sup>‡a</sup>, Fuyue Liu <sup>‡a</sup>, Haoqi Qiu <sup>a</sup>, He Miao <sup>a,\*</sup>, Qin Wang <sup>b</sup>,

Houcheng Zhang <sup>b</sup>, Fu Wang <sup>a</sup>, Jinliang Yuan <sup>a</sup>

<sup>a</sup> Faculty of Maritime and Transportation, Ningbo University, Ningbo  
315211, PR China

<sup>b</sup> Department of Microelectronic Science and Engineering, Faculty of  
Science, Ningbo University, Ningbo 315211, PR China

\*Corresponding author:

Prof. He Miao, E-mail: miaohe@nbu.edu.cn

<sup>‡</sup> These authors contributed equally to this work

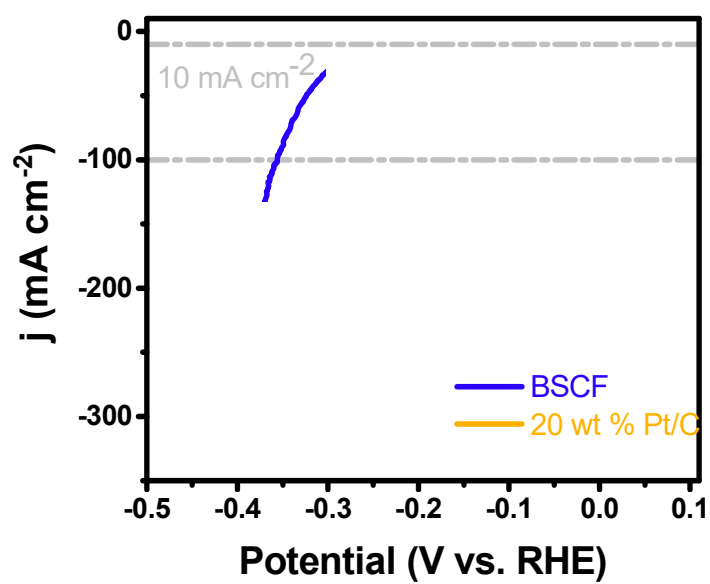

**Figure S1.** HER performances comparison of BSCF and 20 wt% Pt/C.

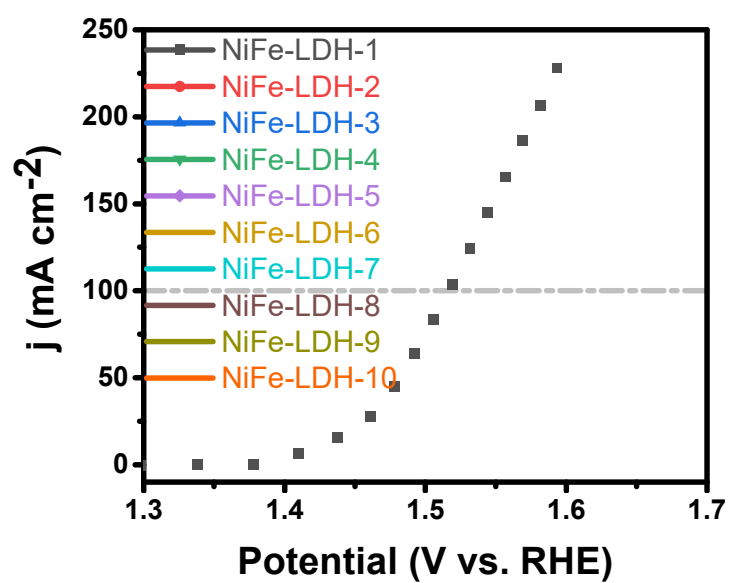

**Figure S2.** 10 Consecutive LSV curves of catalyst NiFe-LDH at the different measuring times.

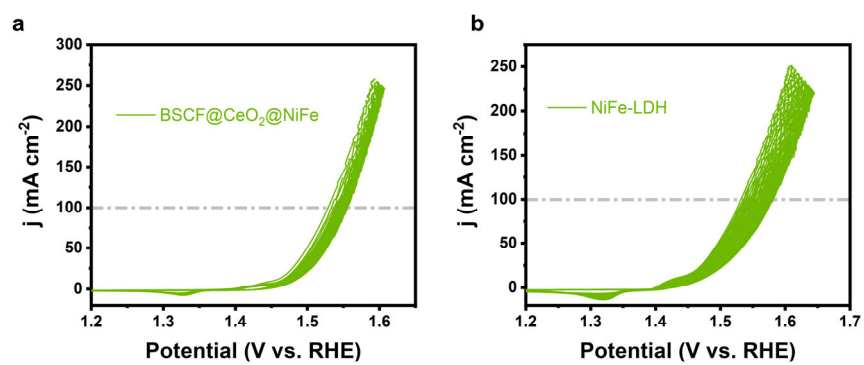

**Figure S3.** CV curves of (a) BSCF@CeO<sub>2</sub>@NiFe-113 and (b) NiFe-LDH at continuous 25-cycle tests.

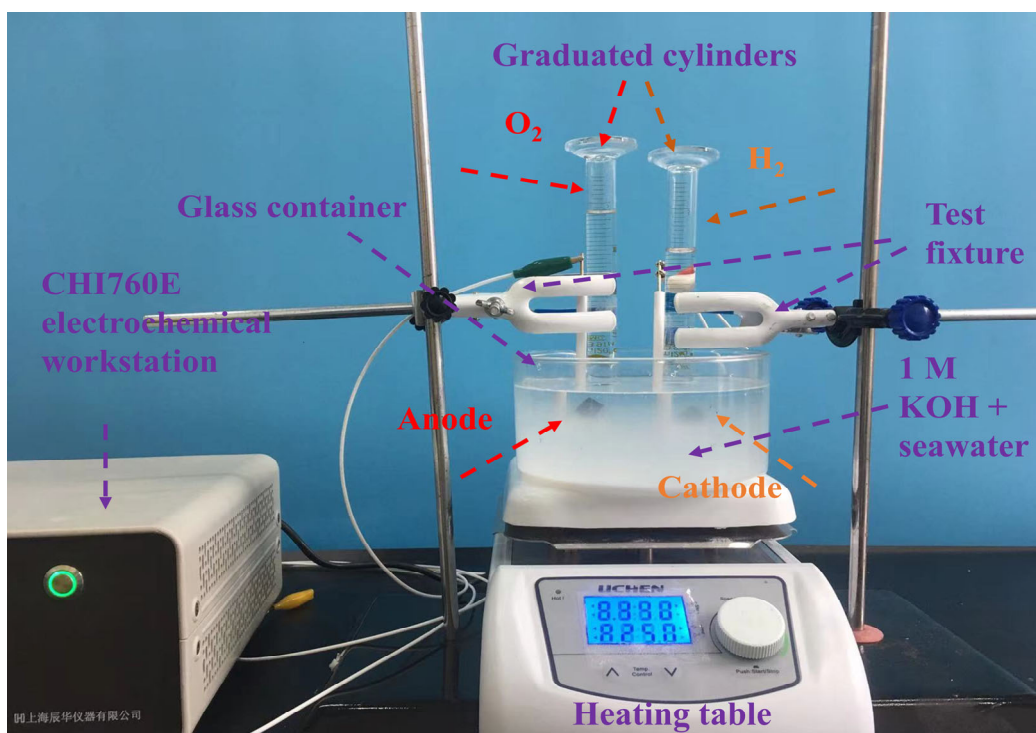

**Figure S4.** Diagram of oxygen evolution Faraday Efficiency test device.

Specifically, the gas volume ( $V_{\text{mea}}$ , mL) of oxygen evolution and hydrogen evolution per 20 min is measured with a graduated cylinder. Then, the corresponding calculation is performed according to the Faraday efficiency (FE) formula:

$$\text{Faraday Efficiency} = \frac{m \times n \times F}{I \times t}. \quad (\text{S1})$$

Where the  $m$  is the actual number of moles of the product,  $n$  is the number of reaction electrons ( $n = 4$  for OER,  $n = 2$  for HER),  $F$  is the Faraday constant ( $F = 96485.3383 \pm 0.0083 \text{ C mol}^{-1}$ ),  $I$  is current,  $t$  is time and the subscript notation  $\text{mea}$  is ‘measured’. The theoretical oxygen evolution and hydrogen evolution Faradaic efficiency is 100 %. The mole and actual FE conversions of the generated gas is based on:

$$m_{\text{mea}} = \frac{V_{\text{mea}}}{V_{\text{m}'}} (\text{mmol}), \quad (\text{S2})$$

$$V_{\text{m}'} = 22.4655 \text{ L mol}^{-1} \text{ (under normal temperature and pressure),} \quad (\text{S3})$$

$$\text{FE} = \frac{m_{\text{mea}}}{m} \times 100 \%. \quad (\text{S4})$$

**Table S1.** The main compositions in natural seawater<sup>[1]</sup>.

| Species          | Conc. [mol kg <sub>H2O</sub> <sup>-1</sup> ] | Conc. [g kg <sub>H2O</sub> <sup>-1</sup> ] |
|------------------|----------------------------------------------|--------------------------------------------|
| H <sub>2</sub> O | /                                            | /                                          |
| Na <sup>+</sup>  | 0.48616                                      | 11.1768                                    |
| Cl <sup>-</sup>  | 0.56576                                      | 20.0579                                    |

**Table S2.** OER performance comparison of BSCF with other perovskites.

| Catalysts                              | $E_{j=10}$ (V) | Tafel slope<br>(mV dec <sup>-1</sup> ) | $E_{j=100}$ (V) | Electrolyte | Substrate     | Reference |
|----------------------------------------|----------------|----------------------------------------|-----------------|-------------|---------------|-----------|
| BSCF                                   | 1.56           | 61.4                                   | 1.65            | 1 M KOH     | Glassy carbon | This work |
| SNCF-NRs                               | 1.60           | 48                                     | ~1.67           | 1 M KOH     | Glassy carbon | [2]       |
| NBCCFe                                 | ~1.57          | N. A. *                                | 1.68            | 1 M KOH     | Carbon paper  | [3]       |
| 3C-SrIrO <sub>3</sub>                  | 1.54           | 74                                     | N. A.           | 1 M KOH     | Glassy carbon | [4]       |
| Sr <sub>2</sub> FeIrO <sub>6</sub>     | 1.60           | 80                                     | N. A.           | 1 M KOH     | Glassy carbon | [4]       |
| CaCoO <sub>3</sub>                     | ~1.56          | N. A.                                  | ~1.63           | 1 M KOH     | Glassy carbon | [5]       |
| SrCoO <sub>3</sub>                     | ~1.57          | N. A.                                  | ~1.65           | 1 M KOH     | Glassy carbon | [5]       |
| LaCoO <sub>3</sub>                     | 1.78           | N. A.                                  | N. A.           | 1 M KOH     | Glassy carbon | [5]       |
| PrBaCo <sub>0.8</sub> W <sub>0.2</sub> | 1.55           | 79.33                                  | N. A.           | 1 M KOH     | Glassy carbon | [6]       |
| PrBaCo                                 | 1.62           | 63.88                                  | N. A.           | 1 M KOH     | Glassy carbon | [6]       |
| BSCF                                   | 1.56           | 119.73                                 | N. A.           | 1 M KOH     | Glassy carbon | [7]       |
| IrO <sub>2</sub>                       | 1.58           | 81                                     | ~1.74           | 1 M KOH     | Glassy carbon | [8]       |

\*: N. A.= Not available.

**Table S3.** Comparison of the OER activities of the different types of perovskite composites in this work and the other reports.

| Catalysts                                      | $E_{j=10}$ (V) | Tafel slope<br>(mV dec <sup>-1</sup> ) | $E_{j=100}$ (V) | Electrolyte    | Preparation method  | Reference        |
|------------------------------------------------|----------------|----------------------------------------|-----------------|----------------|---------------------|------------------|
| BSCF                                           | 1.56           | 61.4                                   | 1.65            | 1 M KOH        | Sol-gel             | This work        |
| BSCF@CeO <sub>2</sub>                          | 1.52           | 47.3                                   | 1.64            | 1 M KOH        | Composite           | This work        |
| <b>BSCF@CeO<sub>2</sub>@NiFe</b>               | <b>1.46</b>    | <b>47.1</b>                            | <b>1.52</b>     | <b>1 M KOH</b> | <b>Composite</b>    | <b>This work</b> |
| BSCF@NiFe(-LDH)                                | 1.47           | 58.5                                   | 1.57            | 1 M KOH        | Composite           | This work        |
| NiFe-LDH                                       | 1.46           | 71.9                                   | 1.54            | 1 M KOH        | Coprecipitation     | This work        |
| SNCF-NRs                                       | 1.60           | 48                                     | ~1.67           | 1 M KOH        | Electrospinning     | [2]              |
| Ni <sub>0.66</sub> Fe <sub>0.33</sub> LDH      | 1.478          | 46                                     | 1.65            | 1 M KOH        | Coprecipitation     | [9]              |
| BSCF/NiFe-25                                   | 1.56           | 52.9                                   | ~1.64           | 1 M KOH        | Composite           | [10]             |
| BSCF-80-ES                                     | 1.54           | N. A. *                                | N. A.           | 1 M KOH        | Electrospinning     | [11]             |
| PBMNC/LDH-20                                   | 1.60           | 108.6                                  | ~1.745          | 1 M KOH        | Composite           | [12]             |
| BSCF-Ag                                        | 1.67           | 122                                    | N. A.           | 1 M KOH        | Doping              | [13]             |
| F-BSCF                                         | 1.51           | 102.65                                 | ~1.68           | 1 M KOH        | Doping              | [7]              |
| p-Cu <sub>1-x</sub> NNi <sub>3-y</sub> /FeNiCu | 1.51           | 52                                     | ~1.64           | 1 M KOH        | Doping              | [14]             |
| CQD/NiFe-LDH                                   | 1.465          | 35                                     | N. A.           | 1 M KOH        | Composite           | [15]             |
| CQDs@BSCF-NFs                                  | 1.58           | 66                                     | ~1.645          | 1 M KOH        | Composite           | [16]             |
| L-0.5/rGO                                      | 1.568          | 80                                     | ~1.68           | 1 M KOH        | Composite           | [17]             |
| a-LNF(t-d)                                     | 1.48           | 36                                     | ~1.545          | 1 M KOH        | A top-down strategy | [18]             |

\*: N. A.= Not available.



## Reference

1. Dresp, S.; Dionigi, F.; Klingenhof, M.; Strasser, P. Direct Electrolytic Splitting of Seawater: Opportunities and Challenges. *ACS Energy Letters* **2019**, *4*, 933-942, doi:10.1021/acsenerylett.9b00220.
2. Zhu, Y.; Zhou, W.; Zhong, Y.; Bu, Y.; Chen, X.; Zhong, Q.; Liu, M.; Shao, Z. A Perovskite Nanorod as Bifunctional Electrocatalyst for Overall Water Splitting. *Advanced Energy Materials* **2017**, *7*, doi:10.1002/aenm.201602122.
3. Kim, N.-I.; Cho, S.-H.; Park, S.H.; Lee, Y.J.; Afzal, R.A.; Yoo, J.; Seo, Y.-S.; Lee, Y.J.; Park, J.-Y. B-site doping effects of  $\text{NdBa}_{0.75}\text{Ca}_{0.25}\text{Co}_2\text{O}_{5+\delta}$  double perovskite catalysts for oxygen evolution and reduction reactions. *Journal of Materials Chemistry A* **2018**, *6*, 17807-17818, doi:10.1039/c8ta06236f.
4. Ye, X.; Song, S.; Li, L.; Chang, Y.-C.; Qin, S.; Liu, Z.; Huang, Y.-C.; Zhou, J.; Zhang, L.-j.; Dong, C.-L.; et al. A'-B Intersite Cooperation-Enhanced Water Splitting in Quadruple Perovskite Oxide  $\text{CaCu}_3\text{Ir}_4\text{O}_{12}$ . *Chemistry of Materials* **2021**, *33*, 9295-9305, doi:10.1021/acs.chemmater.1c03015.
5. Li, X.; Wang, H.; Cui, Z.; Li, Y.; Xin, S.; Zhou, J.; Long, Y.; Jin, C.; Goodenough, J.B. Exceptional oxygen evolution reactivities on  $\text{CaCoO}_3$  and  $\text{SrCoO}_3$ . *Sci Adv* **2019**, *5*, eaav6262, doi:10.1126/sciadv.aav6262.
6. Yan, J.; Xia, M.; Zhu, C.; Chen, D.; Du, F. Perovskite With Tunable Active-Sites Oxidation State by High-Valence W for Enhanced Oxygen Evolution Reaction. *Front Chem* **2021**, *9*, 809111, doi:10.3389/fchem.2021.809111.
7. Xiong, J.; Zhong, H.; Li, J.; Zhang, X.; Shi, J.; Cai, W.; Qu, K.; Zhu, C.; Yang, Z.; Beckman, S.P.; et al. Engineering highly active oxygen sites in perovskite oxides for stable and efficient oxygen evolution. *Applied Catalysis B: Environmental* **2019**, *256*, doi:10.1016/j.apcatb.2019.117817.
8. Oh, N.K.; Seo, J.; Lee, S.; Kim, H.J.; Kim, U.; Lee, J.; Han, Y.K.; Park, H. Highly efficient and robust noble-metal free bifunctional water electrolysis catalyst achieved via complementary charge transfer. *Nat Commun* **2021**, *12*, 4606, doi:10.1038/s41467-021-24829-8.
9. Long, J.; Zhang, J.; Xu, X.; Wang, F. Crystalline NiFe layered double hydroxide with large pore volume as oxygen evolution electrocatalysts. *Materials Chemistry and Physics* **2020**, *254*, doi:10.1016/j.matchemphys.2020.123496.
10. Majee, R.; Islam, Q.A.; Bhattacharyya, S. Surface Charge Modulation of Perovskite Oxides at the Crystalline Junction with Layered Double Hydroxide for a Durable Rechargeable Zinc-Air Battery. *ACS Appl Mater Interfaces* **2019**, *11*, 35853-35862, doi:10.1021/acsami.9b09299.
11. Wu, X.; Miao, H.; Hu, R.; Chen, B.; Yin, M.; Zhang, H.; Xia, L.; Zhang, C.; Yuan, J. A-site deficient perovskite nanofibers boost oxygen evolution reaction for zinc-air batteries. *Applied Surface Science* **2021**, *536*, doi:10.1016/j.apsusc.2020.147806.
12. Mondal, S.; Majee, R.; Arif Islam, Q.; Bhattacharyya, S. 2D Heterojunction Between Double Perovskite Oxide Nanosheet and Layered Double Hydroxide to Promote Rechargeable Zinc-Air Battery Performance. *ChemElectroChem* **2020**, *7*, 5005-5012, doi:10.1002/celc.202001412.
13. Göl, E.Y.; Aytekin, A.; Özkahraman, E.E.; Karabudak, E. Investigation of oxygen

evolution reaction performance of silver doped Ba<sub>0.5</sub>Sr<sub>0.5</sub>Co<sub>0.8</sub>Fe<sub>0.2</sub>O<sub>3-δ</sub> perovskite structure. *Journal of Applied Electrochemistry* **2020**, *50*, 1037-1043, doi:10.1007/s10800-020-01457-6.

14. Zhu, Y.; Chen, G.; Zhong, Y.; Chen, Y.; Ma, N.; Zhou, W.; Shao, Z. A surface-modified antiperovskite as an electrocatalyst for water oxidation. *Nat Commun* **2018**, *9*, 2326, doi:10.1038/s41467-018-04682-y.
15. Tang, D.; Liu, J.; Wu, X.; Liu, R.; Han, X.; Han, Y.; Huang, H.; Liu, Y.; Kang, Z. Carbon quantum dot/NiFe layered double-hydroxide composite as a highly efficient electrocatalyst for water oxidation. *ACS Appl Mater Interfaces* **2014**, *6*, 7918-7925, doi:10.1021/am501256x.
16. Li, G.; Hou, S.; Gui, L.; Feng, F.; Zhang, D.; He, B.; Zhao, L. Carbon quantum dots decorated Ba<sub>0.5</sub>Sr<sub>0.5</sub>Co<sub>0.8</sub>Fe<sub>0.2</sub>O<sub>3</sub>- perovskite nanofibers for boosting oxygen evolution reaction. *Applied Catalysis B: Environmental* **2019**, *257*, doi:10.1016/j.apcatb.2019.117919.
17. Hua, B.; Li, M.; Zhang, Y.-Q.; Sun, Y.-F.; Luo, J.-L. All-In-One Perovskite Catalyst: Smart Controls of Architecture and Composition toward Enhanced Oxygen/Hydrogen Evolution Reactions. *Advanced Energy Materials* **2017**, *7*, doi:10.1002/aenm.201700666.
18. Chen, G.; Zhu, Y.; Chen, H.M.; Hu, Z.; Hung, S.F.; Ma, N.; Dai, J.; Lin, H.J.; Chen, C.T.; Zhou, W.; et al. An Amorphous Nickel-Iron-Based Electrocatalyst with Unusual Local Structures for Ultrafast Oxygen Evolution Reaction. *Adv Mater* **2019**, *31*, e1900883, doi:10.1002/adma.201900883.
